# Supplementary material
Source: PubMed Central journal article supplement (PMC5474309)
Supplement: NIHMS864884-supplement-1.pdf [file NIHMS864884-supplement-1.pdf]

| Strain     | Mating type | Genotype                                                  | Source                                    | Reference  |
|------------|-------------|-----------------------------------------------------------|-------------------------------------------|------------|
| FGSC#2489  | A           | <i>wildtype</i>                                           | The Fungal Genetics Stock Center          | ref. 39    |
| FGSC#4200  | a           | <i>wildtype</i>                                           | The Fungal Genetics Stock Center          | ref. 39    |
| FGSC#8594  | a           | <i>dim-2Δ, his-3</i>                                      | The Fungal Genetics Stock Center          | ref. 39    |
| FGSC#9539  | a           | <i>mus-52Δ, his-3</i>                                     | The Fungal Genetics Stock Center          | ref. 39    |
| FGSC#9720  | A           | <i>mus-52Δ, his-3</i>                                     | The Fungal Genetics Stock Center          | ref. 39    |
| FGSC#11198 | a           | <i>ddb1Δ</i>                                              | The Fungal Genetics Stock Center          | ref. 39    |
| FGSC#12374 | a           | <i>cul4Δ</i>                                              | The Fungal Genetics Stock Center          | ref. 39    |
| FGSC#12353 | a           | <i>ridΔ</i>                                               | The Fungal Genetics Stock Center          | ref. 39    |
| FGSC#12354 | A           | <i>ridΔ</i>                                               | The Fungal Genetics Stock Center          | ref. 39    |
| FGSC#12440 | A           | <i>spo11Δ</i>                                             | The Fungal Genetics Stock Center          | ref. 39    |
| FGSC#14522 | a           | <i>hpoΔ</i>                                               | The Fungal Genetics Stock Center          | ref. 39    |
| FGSC#15885 | a           | <i>dim-5Δ</i>                                             | The Fungal Genetics Stock Center          | ref. 39    |
| S-353      | a           | <i>dim-5Δ, set-7Δ</i>                                     | Zachary Lewis, University of Georgia, USA | ref. 26    |
| S-354      | A           | <i>dim-5Δ, set-7Δ</i>                                     | Zachary Lewis, University of Georgia, USA | ref. 26    |
| T103.3     | A           | <b>802-bp</b> , <i>mus-52Δ, his-3</i>                     | FGSC#9720 transformed with pEAG115A       | ref. 18    |
| T208.3     | A           | <b>RANDOM</b> , <i>mus-52Δ, his-3</i>                     | FGSC#9720 transformed with pEAG186B       | ref. 18    |
| T221.18    | A           | <b>4H-7N</b> , <i>mus-52Δ, his-3</i>                      | FGSC#9720 transformed with pEAG186K       | ref. 18    |
| T223.4     | A           | <b>3H-8N</b> , <i>mus-52Δ, his-3</i>                      | FGSC#9720 transformed with pEAG186L       | ref. 18    |
| T337.1h    | a           | <b>csr-1(Dp)::his-3+</b> , <i>ridΔ, mus-52Δ</i>           | C03.1 transformed with pEAG82B            | this study |
| T364.6     | A           | <b>802-bp</b> , <i>ridΔ</i>                               | FGSC#12354 transformed with pEAG115A      | this study |
| T382.32    | a           | <b>802-bp</b> , <i>dim-2Δ, his-3</i>                      | FGSC#8594 transformed with pEAG115A       | this study |
| T402.1h    | A           | <b>csr-1(Dp)::his-3+</b> , <i>mus-52Δ</i>                 | FGSC#9720 transformed with pEAG82B        | this study |
| T451.6h    | A           | <b>4x::his-3+</b> , <i>ridΔ, mus-52Δ</i>                  | C02.1 transformed with pEAG236A           | this study |
| T452.1h    | A           | <b>4x::his-3+</b> , <i>ridΔ, dim-2Δ, mus-52Δ</i>          | C58.40 transformed with pEAG236A          | this study |
| T475.6h    | a           | <i>ridΔ, dim-5Δ, set-7Δ, mus-52Δ, his-3::dim-5+</i>       | C146.1 transformed with pEAG244B          | this study |
| T482.3     | A           | <b>RANDOM</b> , <i>ridΔ, mus-52Δ, his-3</i>               | C02.1 transformed with pEAG186B           | this study |
| T484.1     | A           | <b>3H-8N</b> , <i>ridΔ, mus-52Δ, his-3</i>                | C02.1 transformed with pEAG186L           | this study |
| T485.4h    | A           | <b>4x::his-3+</b> , <i>mus-52Δ</i>                        | FGSC#9720 transformed with pEAG236A       | this study |
| T486.3h    | a           | <b>4x::his-3+</b> , <i>ridΔ, dim-5Δ, set-7Δ, mus-52Δ</i>  | C146.1 transformed with pEAG236A          | this study |
| T487.3     | A           | <b>4H-7N</b> , <i>ridΔ, mus-52Δ, his-3</i>                | C02.1 transformed with pEAG186K           | this study |
| T488.1h    | a           | <i>ridΔ, dim-5Δ, set-7Δ, mus-52Δ, his-3::dim-5(Y283F)</i> | C146.1 transformed with pEAG244G          | this study |
| T489.1     | A           | <b>NO-REPEAT</b> , <i>mus-52Δ, his-3</i>                  | FGSC#9720 transformed with pEAG66         | this study |
| C02.1      | A           | <i>ridΔ, mus-52Δ, his-3</i>                               | Cross progeny of FGSC#9539 and FGSC#12354 | this study |
| C03.1      | a           | <i>ridΔ, mus-52Δ, his-3</i>                               | Cross progeny of FGSC#9720 and FGSC#12353 | this study |
| C50.3      | A           | <i>ridΔ, dim-2Δ</i>                                       | Cross progeny of FGSC#8594 and FGSC#12354 | this study |
| C52.1      | a           | <b>csr-1(Dp)::his-3+</b> , <i>ridΔ, dim-2Δ</i>            | Cross progeny of C50.3 and T337.1h        | this study |
| C57.8      | A           | <b>802-bp</b> , <i>ridΔ, dim-2Δ</i>                       | Cross progeny of C52.1 and T364.6         | this study |
| C58.7      | a           | <i>ridΔ, dim-2Δ, mus-52Δ, his-3</i>                       | Cross progeny of C50.3 and C03.1          | this study |
| C58.40     | A           | <i>ridΔ, dim-2Δ, mus-52Δ, his-3</i>                       | Cross progeny of C50.3 and C03.1          | this study |
| C96.1      | A           | <i>dim-2Δ</i>                                             | Cross progeny of FGSC#8594 and FGSC#2489  | this study |
| C97.2      | A           | <b>802-bp</b> , <i>ridΔ, hpoΔ</i>                         | Cross progeny of FGSC#14522 and T364.6    | this study |
| C97.6      | a           | <b>802-bp</b> , <i>hpoΔ</i>                               | Cross progeny of FGSC#14522 and T364.6    | this study |
| C98.18     | A           | <b>802-bp</b> , <i>ridΔ, dim-5Δ</i>                       | Cross progeny of FGSC#15885 and T364.6    | this study |
| C135.3     | A           | <b>802-bp</b> , <i>set-7Δ, spo11Δ, hpoΔ</i>               | Cross progeny of XG1.2 and FGSC#12440     | this study |
| C139.10    | a           | <i>ridΔ, set-7Δ, mus-52Δ, his-3</i>                       | Cross progeny of C58.7 and S-354          | this study |
| C146.1     | a           | <i>ridΔ, dim-5Δ, set-7Δ, mus-52Δ, his-3</i>               | Cross progeny of XG3.4 and C139.10        | this study |
| C146.3     | a           | <i>ridΔ, dim-5Δ, set-7Δ</i>                               | Cross progeny of XG3.4 and C139.10        | this study |
| R88.6      | A           | <b>csr-1(Dp)::his-3+</b>                                  | Cross progeny of C52.1 and FGSC#2489      | this study |
| XG1.2      | a           | <b>802-bp</b> , <i>set-7Δ, dim-5Δ, hpoΔ</i>               | Cross progeny of C97.2 and S-353          | this study |
| XG1B.17    | a           | <i>set-7Δ</i>                                             | Cross progeny of C97.2 and S-353          | this study |
| XG3.4      | A           | <b>802-bp</b> , <i>dim-5Δ, set-7Δ</i>                     | Cross progeny of C97.6 and S-354          | this study |
| XG3.7      | A           | <b>802-bp</b> , <i>set-7Δ</i>                             | Cross progeny of C97.6 and S-354          | this study |
| XG3B.11    | a           | <i>set-7Δ, hpoΔ</i>                                       | Cross progeny of C97.6 and S-354          | this study |
| XG26.8     | A           | <b>802-bp</b> , <i>dim-5Δ, set-7Δ, ridΔ</i>               | Cross progeny of C98.18 and C146.3        | this study |

### Supplementary Table 1. *N. crassa* strains used in this study

All inserts were validated by PCR and sequencing; all gene deletions were validated by diagnostic PCR. Primer sequences are provided in Supplementary Table 3. Tester repeats are shown in bold.

| Figure           | Cross | Cross genotype          |                                                 | Parental strains |                |     | Reference  |
|------------------|-------|-------------------------|-------------------------------------------------|------------------|----------------|-----|------------|
|                  |       | <i>rid, dim-2</i>       | <i>other</i>                                    | Female           | Male           | {N} |            |
| <b>Fig. 1</b>    |       |                         |                                                 |                  |                |     |            |
| <b>b</b>         | X1    | <i>rid+/+, dim-2+/+</i> |                                                 | FGSC#4200        | <b>T103.3</b>  | 24  | ref. 18    |
| <b>b</b>         | X2    | <i>ridΔ/Δ, dim-2+/+</i> |                                                 | T337.1h          | <b>T364.6</b>  | 48  | this study |
| <b>b</b>         | X3    | <i>ridΔ/Δ, dim-2Δ/Δ</i> |                                                 | C52.1            | <b>C57.8</b>   | 48  | this study |
| <b>b</b>         | X4    | <i>rid+/+, dim-2Δ/Δ</i> |                                                 | C96.1            | <b>T382.32</b> | 24  | this study |
| <b>b</b>         | X5    | <i>rid+/Δ, dim-2+/+</i> |                                                 | FGSC#4200        | <b>T364.6</b>  | 24  | this study |
| <b>b</b>         | X6    | <i>rid+/+, dim-2+/Δ</i> |                                                 | FGSC#2489        | <b>T382.32</b> | 24  | this study |
| <b>c</b>         | X7    | <i>rid+/+, dim-2+/+</i> |                                                 | FGSC#4200        | <b>T489.1</b>  | 48  | this study |
| <b>Fig. 2</b>    |       |                         |                                                 |                  |                |     |            |
| <b>b</b>         | X8    | <i>ridΔ/Δ, dim-2+/+</i> | <i>dim-5Δ/+, set-7Δ/+</i>                       | C146.3           | <b>T364.6</b>  | 60  | this study |
| <b>b</b>         | X9    | <i>ridΔ/Δ, dim-2+/+</i> | <i>dim-5Δ/Δ, set-7Δ/+</i>                       | C146.3           | <b>C98.18</b>  | 60  | this study |
| <b>c</b>         | X10   | <i>ridΔ/Δ, dim-2+/+</i> | <i>dim-5Δ/Δ, set-7Δ/Δ</i>                       | <b>XG26.8</b>    | C146.1         | 60  | this study |
| <b>c</b>         | X11   | <i>ridΔ/Δ, dim-2+/+</i> | <i>dim-5Δ/+, set-7Δ/Δ</i>                       | <b>XG26.8</b>    | C139.10        | 60  | this study |
| <b>c</b>         | X12   | <i>ridΔ/Δ, dim-2+/+</i> | <i>his-3::dim-5+, dim-5Δ/Δ, set-7Δ/Δ</i>        | <b>XG26.8</b>    | T475.6h        | 60  | this study |
| <b>c</b>         | X13   | <i>ridΔ/Δ, dim-2+/+</i> | <i>his-3::dim-5 (Y283F), dim-5Δ/Δ, set-7Δ/Δ</i> | <b>XG26.8</b>    | T488.1h        | 60  | this study |
| <b>d</b>         | X14   | <i>rid+/Δ, dim-2+/+</i> | <i>dim-5+/+, set-7Δ/+</i>                       | XG1B.17          | <b>T364.6</b>  | 24  | this study |
| <b>d</b>         | X15   | <i>rid+/Δ, dim-2+/+</i> | <i>dim-5Δ/+, set-7Δ/+</i>                       | S-353            | <b>T364.6</b>  | 24  | this study |
| <b>d</b>         | X16   | <i>rid+/Δ, dim-2+/+</i> | <i>dim-5Δ/Δ, set-7Δ/+</i>                       | S-353            | <b>C98.18</b>  | 48  | this study |
| <b>e</b>         | X17   | <i>rid+/+, dim-2+/+</i> | <i>hpoΔ/Δ, set-7Δ/Δ, spo11Δ/+</i>               | <b>C135.3</b>    | XG3B.11        | 48  | this study |
| <b>f</b>         | X18   | <i>rid+/+, dim-2+/+</i> | <i>set-7Δ/+</i>                                 | <b>XG3.7</b>     | FGSC#4200      | 24  | this study |
| <b>f</b>         | X19   | <i>rid+/+, dim-2+/+</i> | <i>ddb1+/Δ, set-7Δ/+</i>                        | <b>XG3.7</b>     | FGSC#11198     | 24  | this study |
| <b>f</b>         | X20   | <i>rid+/+, dim-2+/+</i> | <i>cul4+/Δ, set-7Δ/+</i>                        | <b>XG3.7</b>     | FGSC#12374     | 24  | this study |
| <b>Fig. 3</b>    |       |                         |                                                 |                  |                |     |            |
| <b>c</b>         | X21   | <i>ridΔ/Δ, dim-2+/+</i> |                                                 | T337.1h          | <b>T482.3</b>  | 60  | this study |
| <b>c</b>         | X22   | <i>ridΔ/Δ, dim-2+/+</i> |                                                 | T337.1h          | <b>T484.1</b>  | 60  | this study |
| <b>c</b>         | X23   | <i>ridΔ/Δ, dim-2+/+</i> |                                                 | T337.1h          | <b>T487.3</b>  | 60  | this study |
| <b>c</b>         | X24   | <i>rid+/+, dim-2+/+</i> |                                                 | FGSC#4200        | <b>T208.3</b>  | 60  | ref. 18    |
| <b>c</b>         | X25   | <i>rid+/+, dim-2+/+</i> |                                                 | FGSC#4200        | <b>T223.4</b>  | 90  | ref. 18    |
| <b>c</b>         | X26   | <i>rid+/+, dim-2+/+</i> |                                                 | FGSC#4200        | <b>T221.18</b> | 60  | ref. 18    |
| <b>Fig. 4</b>    |       |                         |                                                 |                  |                |     |            |
| <b>b</b>         | X27   | <i>rid+/Δ, dim-2Δ/Δ</i> |                                                 | FGSC#8594        | <b>T452.1h</b> | 14  | this study |
| <b>b</b>         | X28   | <i>ridΔ/Δ, dim-2+/+</i> |                                                 | C03.1            | <b>T451.6h</b> | 30  | this study |
| <b>Fig. 5</b>    |       |                         |                                                 |                  |                |     |            |
| <b>d</b>         | X29   | <i>rid+/+, dim-2+/+</i> |                                                 | <b>R88.6</b>     | FGSC#4200      | 10  | this study |
| <b>d</b>         | X30   | <i>ridΔ/Δ, dim-2+/+</i> |                                                 | <b>T337.1h</b>   | C02.1          | 70  | this study |
| <b>d</b>         | X31   | <i>ridΔ/Δ, dim-2Δ/Δ</i> |                                                 | C50.3            | <b>C52.1</b>   | 28  | this study |
| <b>SI Fig. 4</b> |       |                         |                                                 |                  |                |     |            |
| <b>b</b>         | X32   | <i>rid+/+, dim-2+/+</i> | <i>set-7Δ/Δ</i>                                 | XG1B.17          | <b>XG3.7</b>   | 24  | this study |

### Supplementary Table 2. Crosses analyzed in this study

**Figure**, Figure/panel with a corresponding RIP mutation profile; **Cross**, a unique cross identifier used in this study; **Cross genotype**, provided as pairs of maternal/paternal alleles; **Parental strains**, strains are provided in Supplementary Table 1. Strains with the assayed repeats are shown in bold; {N}, the total number of progeny spores analyzed (by sequencing) for a given cross/condition.

All sequence alignments are provided in Supplementary Data Set 2. Data for crosses X1, X24, X25 and X26 were published previously (ref. 18) and are provided here for convenience.

| <b>Name</b>       | <b>Sequence (5' → 3')</b> |
|-------------------|---------------------------|
| <i>CSR1_SeqF</i>  | CGGATGTCTTTGGATAGCTCT     |
| <i>CSR1_SeqR</i>  | CGGACATGGACTTACGTTACC     |
| <i>CSR1_SeqR2</i> | GGCATCTGGAACCGGACCAT      |
| <i>CSR1_SeqR3</i> | GATGGCTTAGTAGAGCCTGTC     |
| <i>LNK_SeqR1</i>  | CAGATAGAGCTTGGAGCTTTGG    |
| <i>NcHis3_F4</i>  | GTACATGAACGGGAAGCAC       |
| <i>NcHis3_F7</i>  | GTAGTGGGTTGATGTATATCTGG   |
| <i>NcHis3_R1</i>  | ATCCGGCCAAACCCTGACAT      |
| <i>NcHis3_R4</i>  | CCAACACCAAGCAGTAATCTCA    |
| <i>NcHis3_R6</i>  | GGATTGCACAGACGGTGGA       |
| <i>P236A_Seq1</i> | GGTAGTGGAGGTTAAGCGTTA     |
| <i>P236A_Seq2</i> | GGCCACCATGTTTTGGAAGTTA    |
| <i>P236A_Seq4</i> | CGCCCTAATTAACCCTCACTA     |
| <i>P236A_Seq5</i> | AATACGACTCACTATAGGGCGA    |
| <i>P236A_Seq8</i> | CGGTACCAGCTTTTGTTC        |
| <i>P66_Seq1</i>   | CCACAACCGGTACGTTATCATT    |
| <i>P66_Seq3</i>   | GCTACCGCCATACGAAGTGTT     |
| <i>P66_Seq3</i>   | GCTACCGCCATACGAAGTGTT     |
| <i>P66_Seq4</i>   | ATGCGACCGAGCATCGTC        |
| <i>P66_Seq9</i>   | CCAGCCTTGATGTCGTAGAGT     |
| <i>P66_Seq10</i>  | CGCTTCCATGCATTTTGGATG     |
| <i>P66_Seq12</i>  | AGCGACAGTGATGACGATGC      |
| <i>P66_Seq17</i>  | AGGAAATCCACCGCGGCTT       |
| <i>P66_Seq18</i>  | GAGAATGGTGCCAGTGTGG       |
| <i>REG_A_F1</i>   | TTCAACCCTTTGGATGGCGATG    |
| <i>REG_A_R1</i>   | TTGGCCGGATCAGGGTATGTTT    |
| <i>REG_B_F1</i>   | TACCCAGACCAAGGGAAGTGTT    |
| <i>REG_B_R1</i>   | TTGCTCACAGGACACACCTAGA    |
| <i>REG_C_F1</i>   | ACACCAAGAAGCCAGTGGAAC     |
| <i>REG_C_R1</i>   | AAGACCTGAGACGAGAGGGA      |
| <i>RIP2_R1</i>    | TGCCCTGTCTATGATATGTGC     |
| <i>RIP2_R2</i>    | AGGAAGGCGGACCTGTCA        |
| <i>RIP2_R3</i>    | GACCAGTGCAACTCGGTTTG      |
| <i>CUL4_F1</i>    | GAGAGAGTACGTGAGGAGGTTT    |
| <i>CUL4_R1</i>    | TGTCTATCCAGCTCAGCATCTT    |
| <i>DDB1_F1</i>    | ATACCGCGTGATCTCGTCTT      |
| <i>DDB1_R1</i>    | AGGAAGCTTGTACCGACGAT      |
| <i>DIM2_F</i>     | CCGCCAAGACCAAAAGTAGC      |
| <i>DIM2_R</i>     | CTTTGGCTTGCCAAGATTCC      |
| <i>DIM5_F1</i>    | GTAAGTCATCCAACGTCATCCC    |
| <i>DIM5_R1</i>    | GAGGGCAAACAAGTAGACATCC    |
| <i>HP1_F1</i>     | CAAGTACACAATTCCAGAGCCC    |
| <i>HP1_R1</i>     | AATGTTATCAGCCGAGACTCCT    |
| <i>MUS52_F</i>    | CGAACACCACTTGGCGATAA      |
| <i>MUS52_R</i>    | GGCCTGTCTCTCCCATGTTT      |
| <i>RID_RTF</i>    | CCCATTTCCCTACCAACTCAT     |
| <i>RID_RTR</i>    | GTGGGTGGAAATGCGGTTATTG    |
| <i>SET7_F1</i>    | GCTCACCTTTGTTCCCTCATCTC   |
| <i>SET7_R1</i>    | CCGTTACTGICTGATTGGTCAC    |
| <i>SPO11_F</i>    | GTGTCGGAAGTCCCATTACCA     |
| <i>SPO11_R</i>    | GTGACGCTGTGTAGTCGCTTG     |

**Supplementary Table 3. Primers used in this study**
